# Supplementary material
Source: Springer Nature journal article supplement (https://www.springermedizin.de/resource/supplementary/12955_2012_1095_MOESM1_ESM.pdf/9559260)
Supplement: MOESM1 [file 9559260]

Using the scale below, circle the appropriate number for each item. There are no 'right' or 'wrong' answers; many of these are true of all children at times.

| Never | Rarely | Sometimes | Quite often | Very often | Always |
|-------|--------|-----------|-------------|------------|--------|
| 0     | 1      | 2         | 3           | 4          | 5      |

|     |                                      |   |   |   |   |   |   |
|-----|--------------------------------------|---|---|---|---|---|---|
| 1.  | My child smiles at me                | 0 | 1 | 2 | 3 | 4 | 5 |
| 2.  | My child annoys me                   | 0 | 1 | 2 | 3 | 4 | 5 |
| 3.  | My child likes doing things with me  | 0 | 1 | 2 | 3 | 4 | 5 |
| 4.  | My child talks to me                 | 0 | 1 | 2 | 3 | 4 | 5 |
| 5.  | My child irritates me                | 0 | 1 | 2 | 3 | 4 | 5 |
| 6.  | My child likes me                    | 0 | 1 | 2 | 3 | 4 | 5 |
| 7.  | My child wants too much attention    | 0 | 1 | 2 | 3 | 4 | 5 |
| 8.  | My child laughs                      | 0 | 1 | 2 | 3 | 4 | 5 |
| 9.  | My child gets moody                  | 0 | 1 | 2 | 3 | 4 | 5 |
| 10. | My child dominates me                | 0 | 1 | 2 | 3 | 4 | 5 |
| 11. | My child like to please me           | 0 | 1 | 2 | 3 | 4 | 5 |
| 12. | My child cries for no obvious reason | 0 | 1 | 2 | 3 | 4 | 5 |
| 13. | My child is affectionate towards me  | 0 | 1 | 2 | 3 | 4 | 5 |
| 14. | My child winds me up                 | 0 | 1 | 2 | 3 | 4 | 5 |

### CPRS

Please reflect on the degree to which each of the following statements currently applies to your relationship with your child. Using the scale below, circle the appropriate number for each item.

| Definitely does not apply | Not really | Neutral, not sure | Applies somewhat | Definitely applies |
|---------------------------|------------|-------------------|------------------|--------------------|
| 0                         | 1          | 2                 | 3                | 4                  |

|     |                                                                              |   |   |   |   |   |
|-----|------------------------------------------------------------------------------|---|---|---|---|---|
| 1.  | I share an affectionate, warm relationship with my child                     | 1 | 2 | 3 | 4 | 5 |
| 2.  | My child and I always seem to be struggling with each other                  | 1 | 2 | 3 | 4 | 5 |
| 3.  | If upset, my child will seek affection from me                               | 1 | 2 | 3 | 4 | 5 |
| 4.  | My child is uncomfortable with physical affection or touch from me           | 1 | 2 | 3 | 4 | 5 |
| 5.  | My child values his/her relationship with me                                 | 1 | 2 | 3 | 4 | 5 |
| 6.  | When I praise my child he/her beams with pride                               | 1 | 2 | 3 | 4 | 5 |
| 7.  | My child spontaneously shares information about himself/herself              | 1 | 2 | 3 | 4 | 5 |
| 8.  | My child easily becomes angry at me                                          | 1 | 2 | 3 | 4 | 5 |
| 9.  | It is easy to be in tune with what my child is feeling                       | 1 | 2 | 3 | 4 | 5 |
| 10. | My child remains angry or is resistant after being disciplined               | 1 | 2 | 3 | 4 | 5 |
| 11. | Dealing with my child drains my energy                                       | 1 | 2 | 3 | 4 | 5 |
| 12. | When my child is in a bad mood, I know we're in for a long and difficult day | 1 | 2 | 3 | 4 | 5 |
| 13. | My child's feelings towards me can be unpredictable or can change suddenly   | 1 | 2 | 3 | 4 | 5 |
| 14. | My child is sneaky or manipulative with me                                   | 1 | 2 | 3 | 4 | 5 |
| 15. | My child openly shares his/her feelings and experiences with me              | 1 | 2 | 3 | 4 | 5 |
